# Supplementary figures and images for: Knowledge-Based Neuroendocrine Immunomodulation (NIM) Molecular Network Construction and Its Application
Source: MDPI journal article supplement (doi:10.3390/molecules23061312), 2018-05-30

**(A)**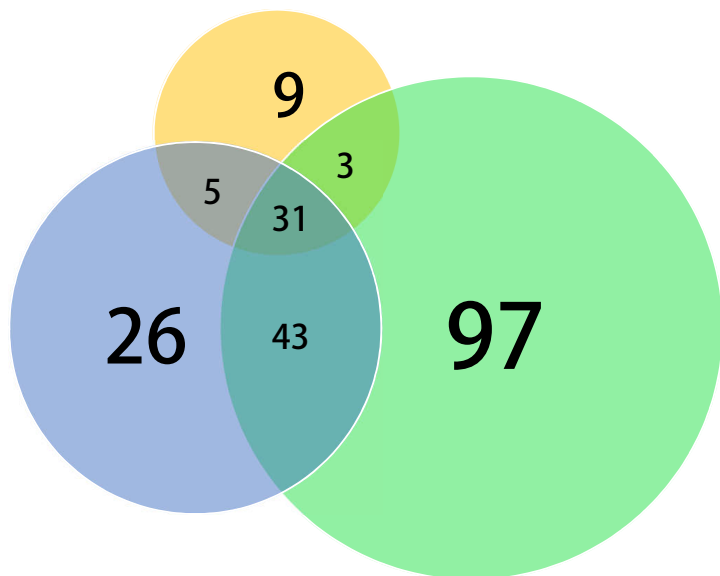**(B)**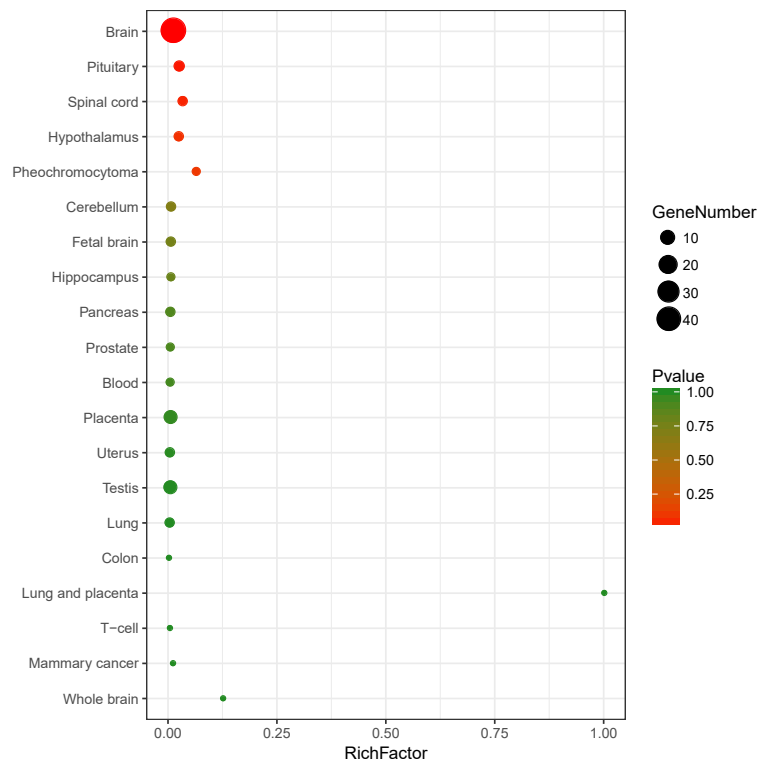**(C)**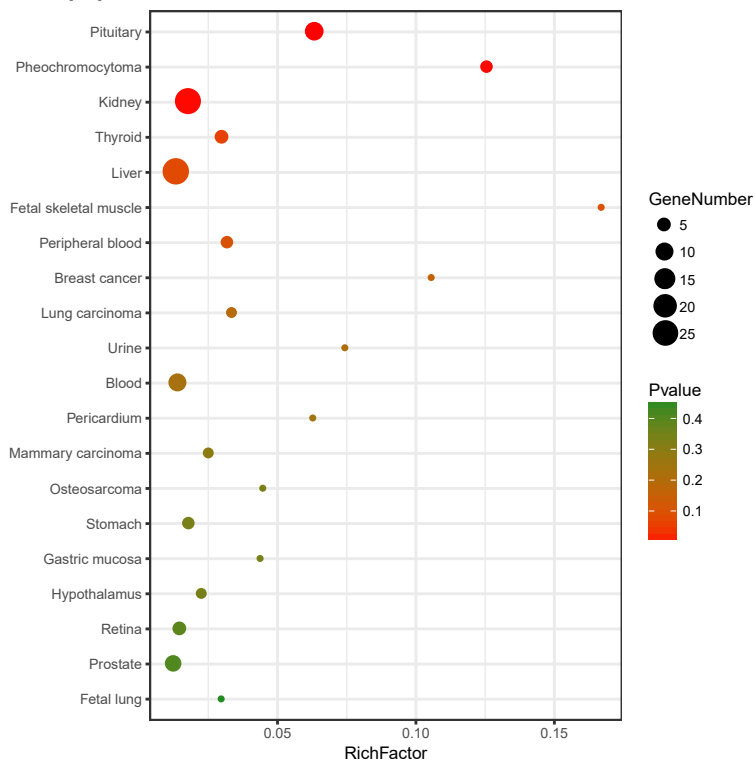**(D)**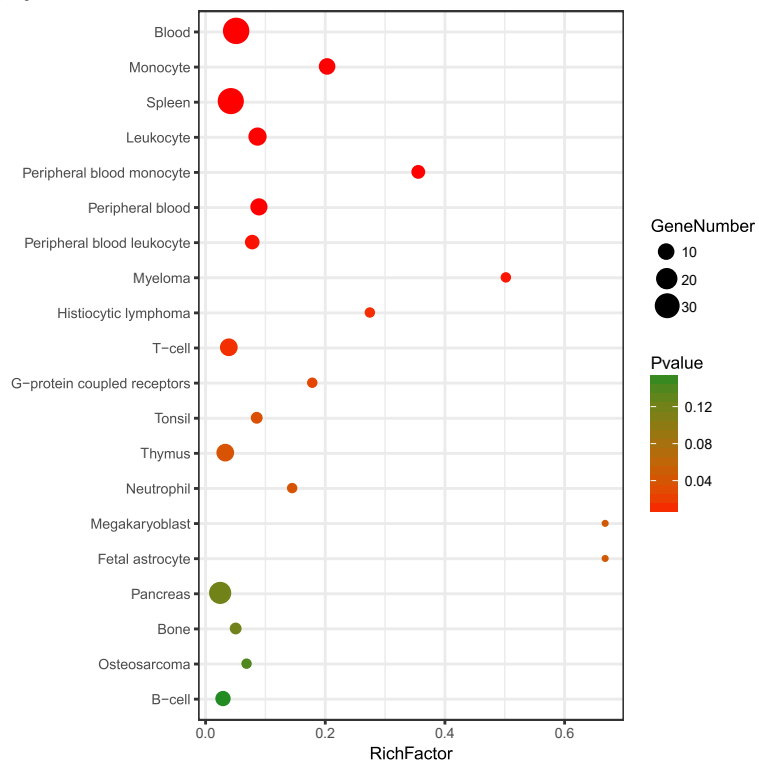

Supplement: s1 [file s1]

**(A)**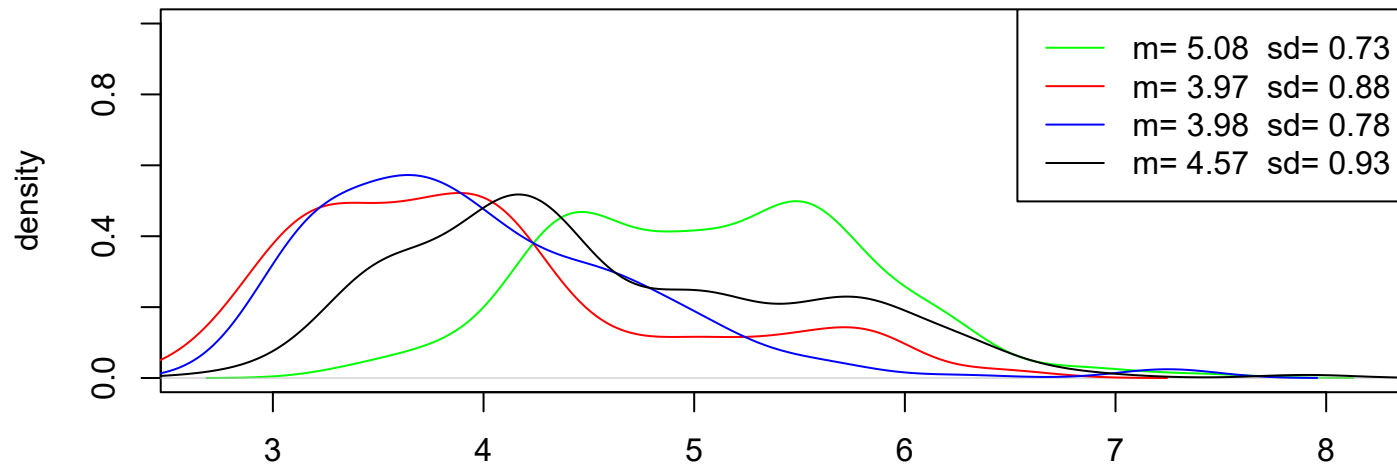**(B)**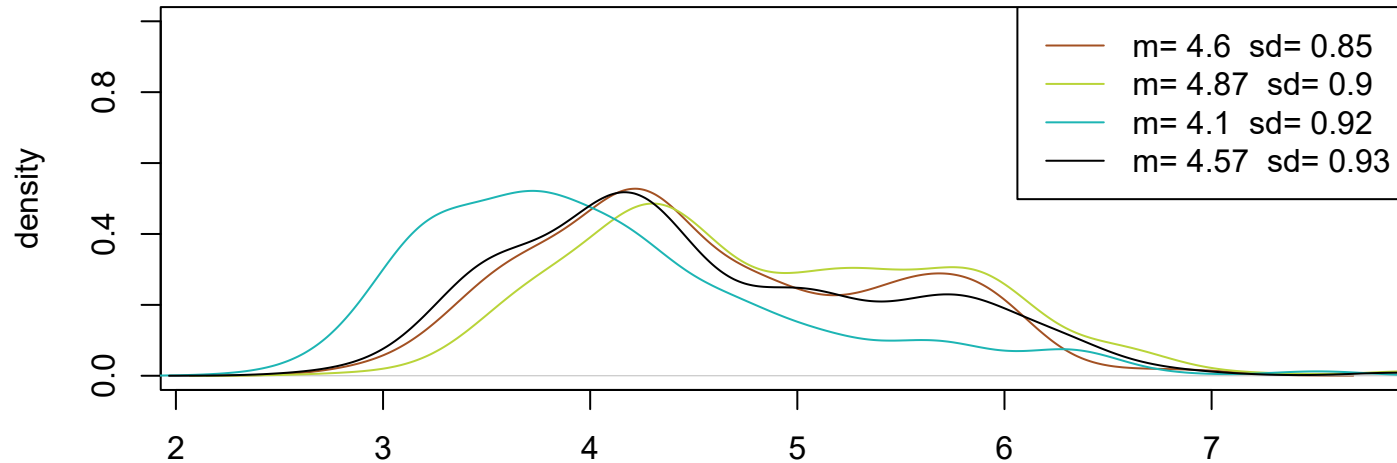

Supplement: s1 [file s1]

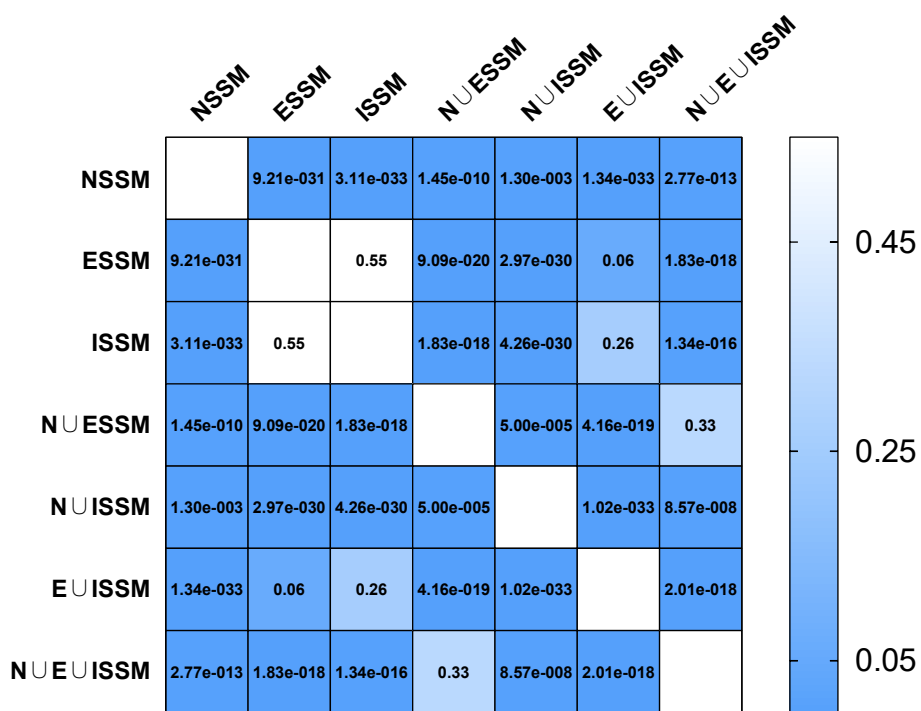

Supplement: s1 [file s1]
